# Supplementary material for: New Coumarins and Anti-Inflammatory Constituents from the Fruits of Cnidium monnieri
Source: PubMed Central journal article supplement (PMC4100110; doi:10.3390/ijms15069566), 2014-05-28

# Supplementary Information

Figure S1. ESI-MS spectrum of 1.

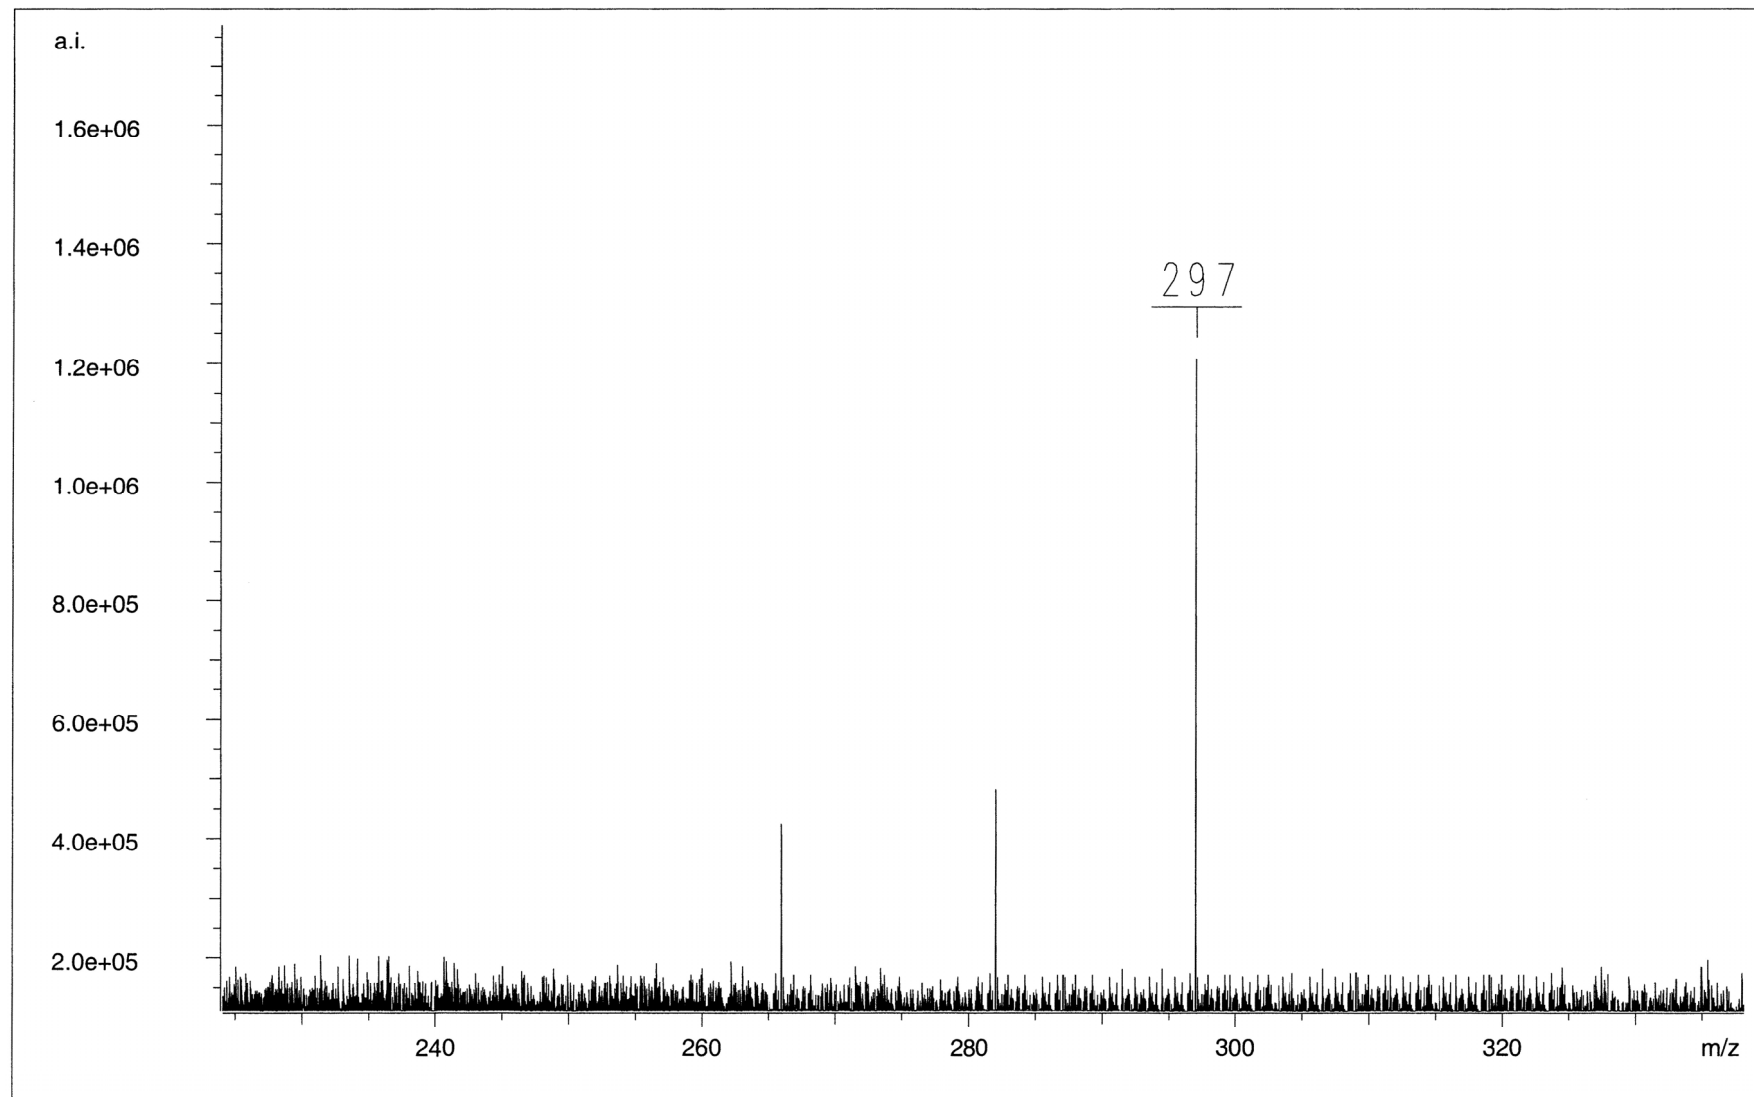

Figure S2. HR-ESI-MS spectrum of 1.

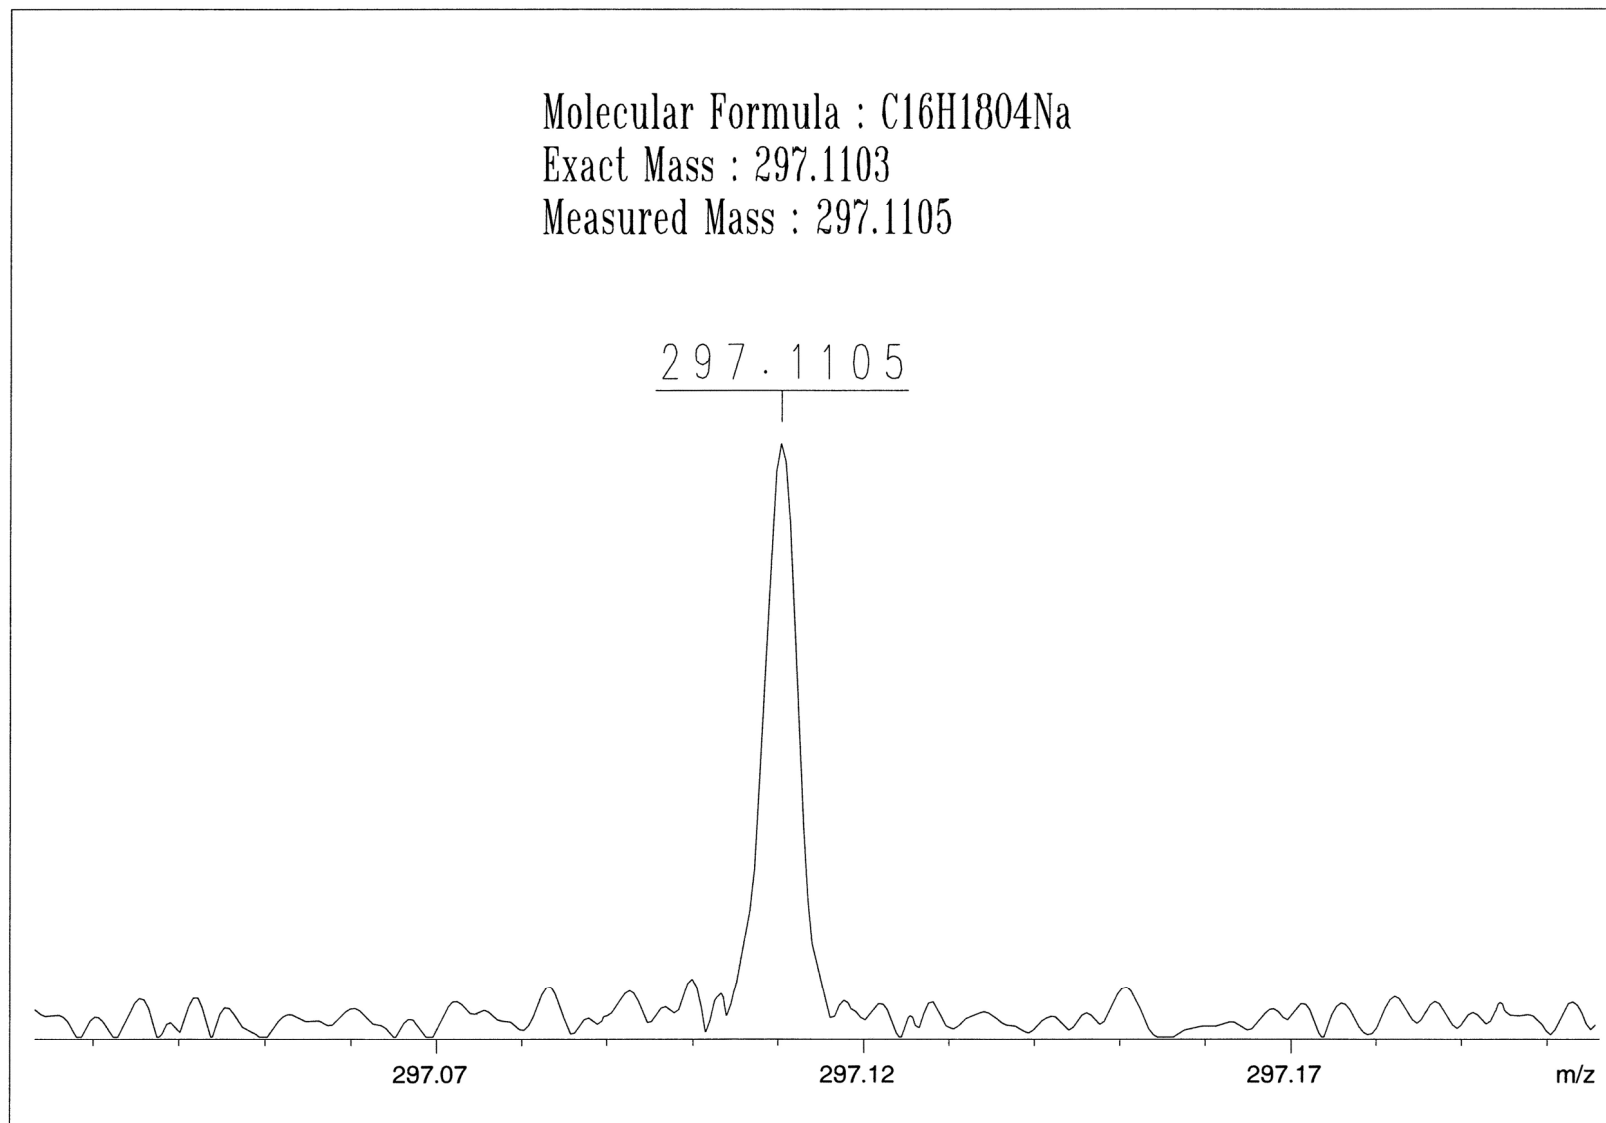

Figure S3. <sup>1</sup>H-NMR spectrum (CDCl<sub>3</sub>, 500 MHz) of 1.

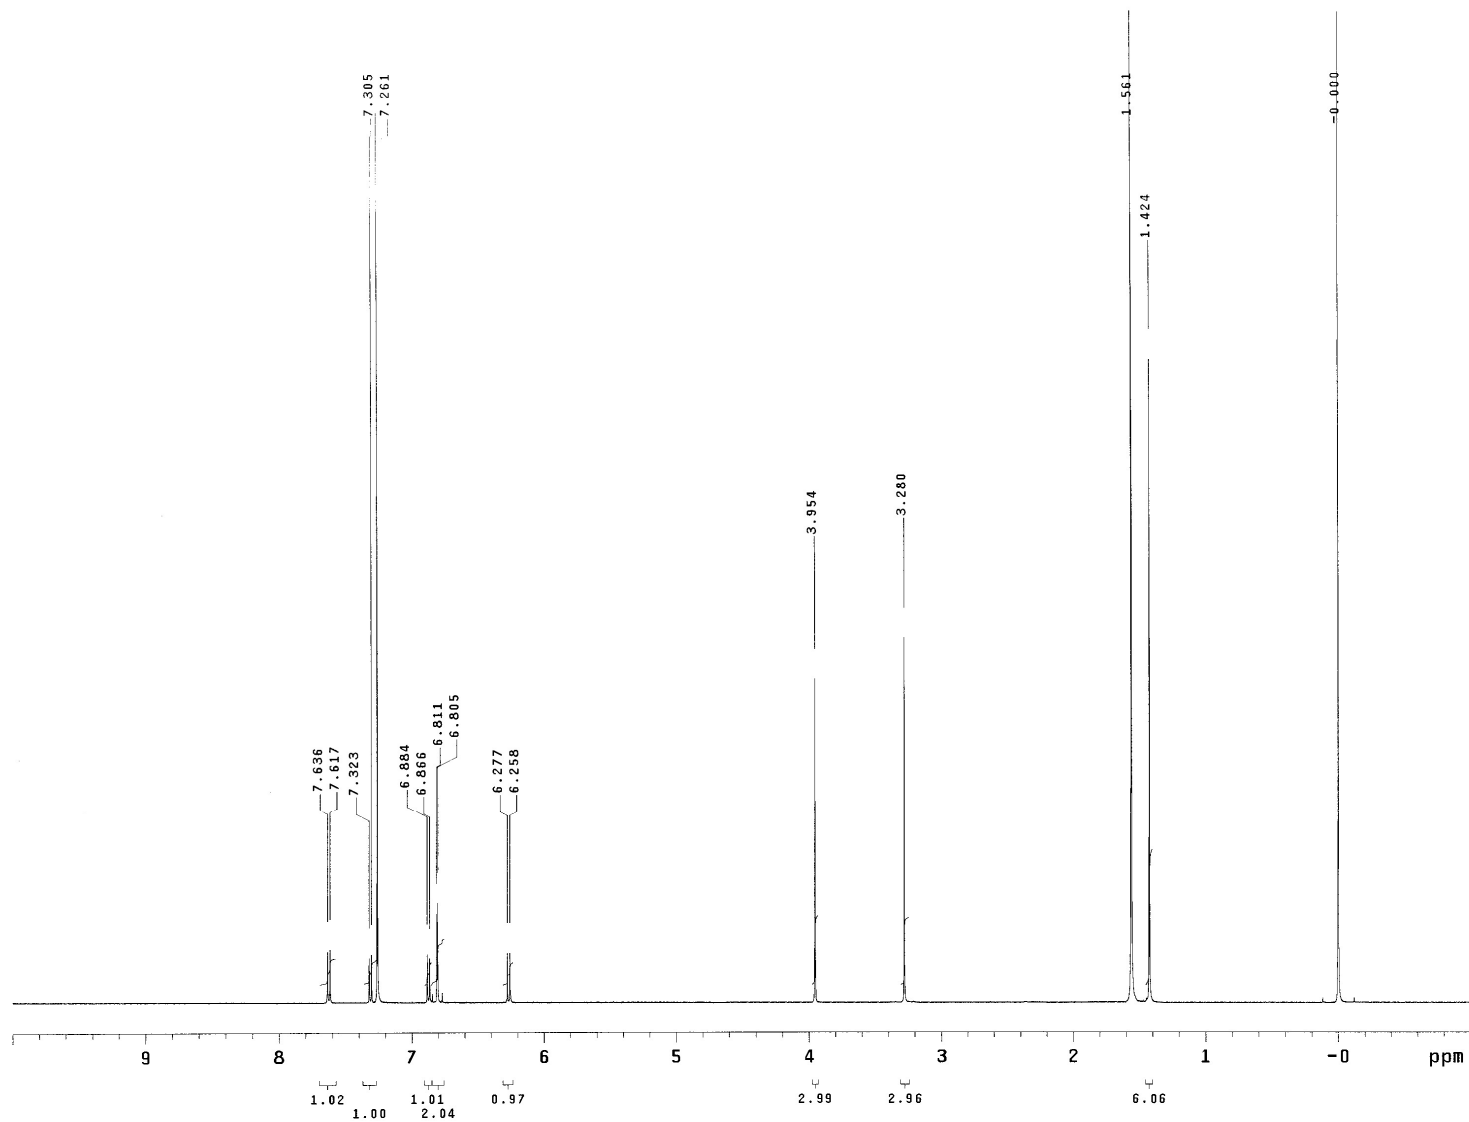

Figure S4.  $^{13}\text{C}$ -NMR spectrum ( $\text{CDCl}_3$ , 125 MHz) of 1.

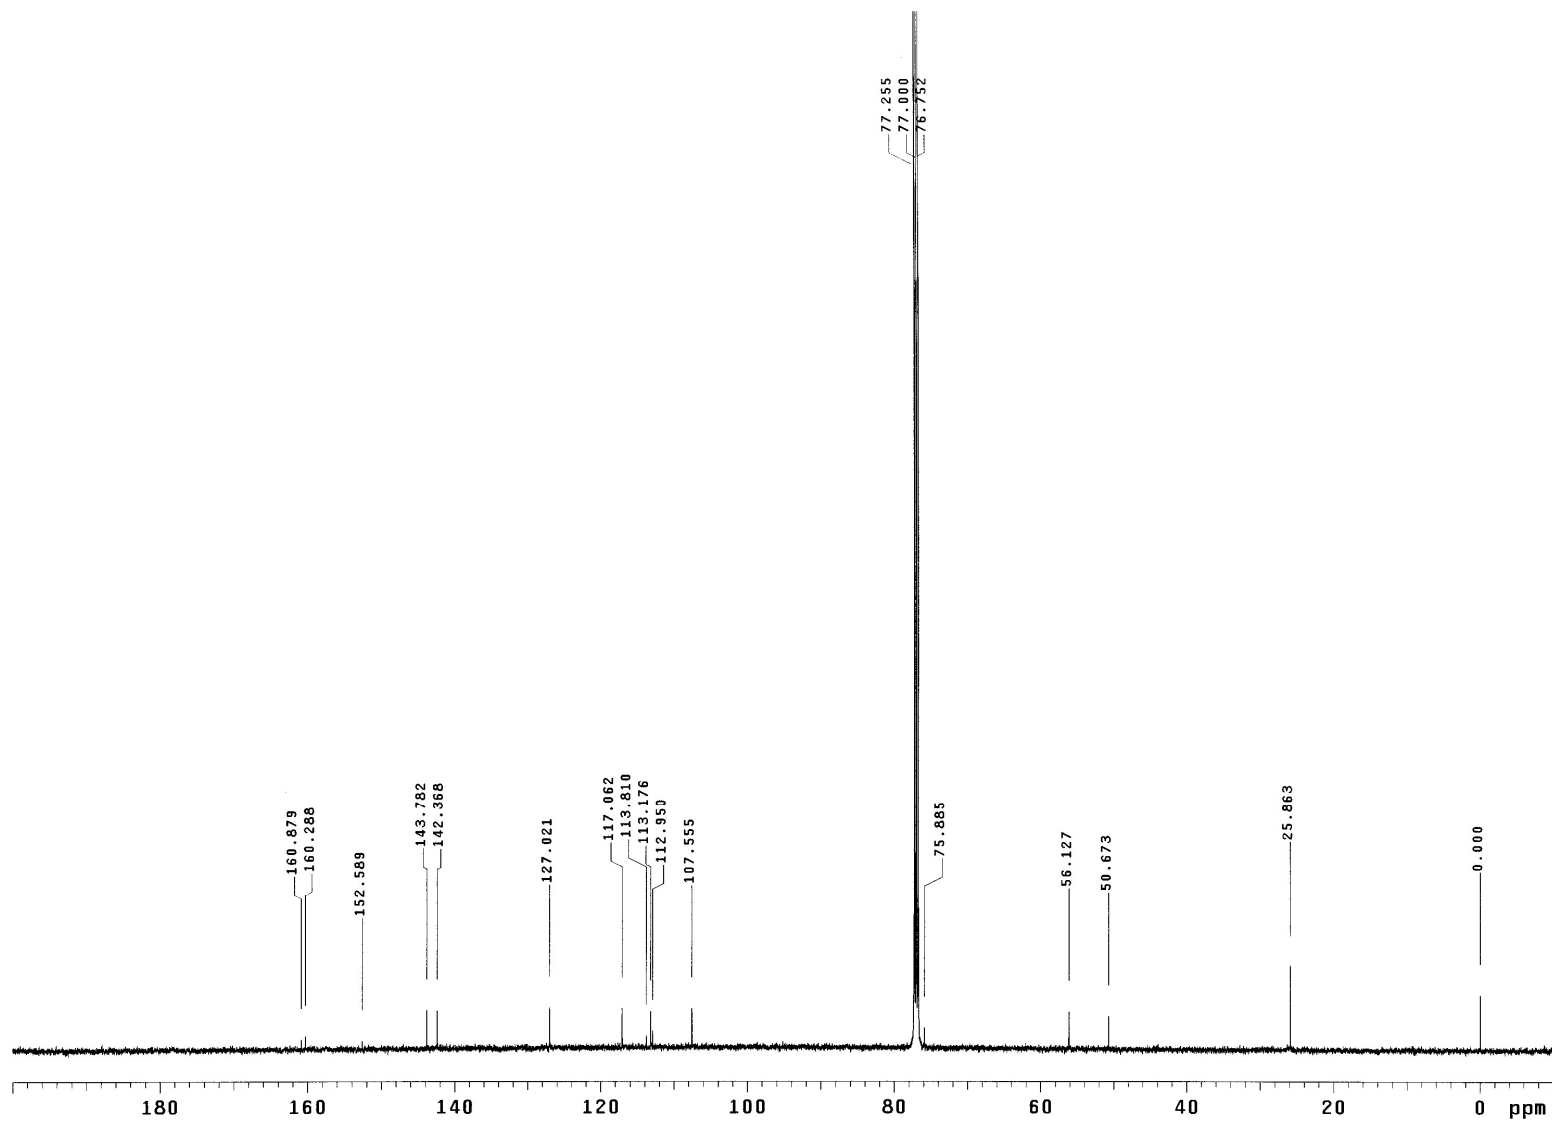

Figure S5. ESI-MS spectrum of 2.

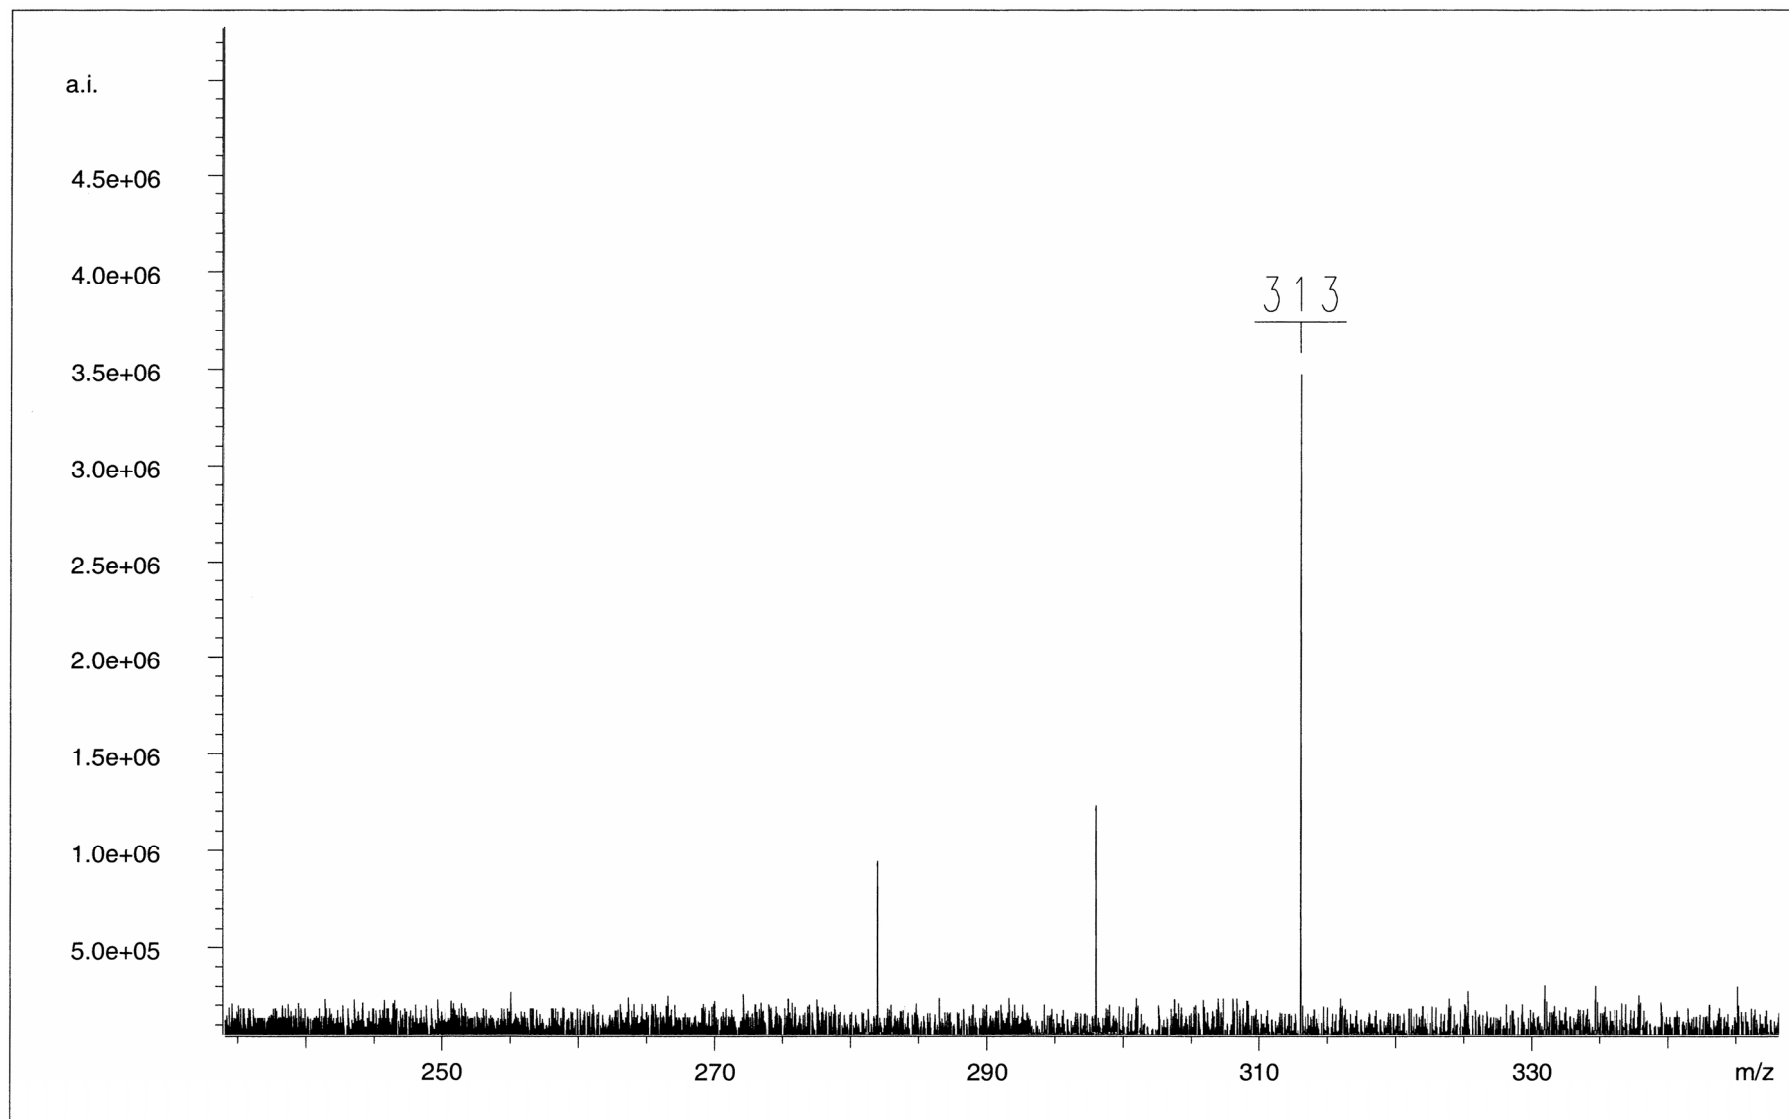

Figure S6. HR-ESI-MS spectrum of 2.

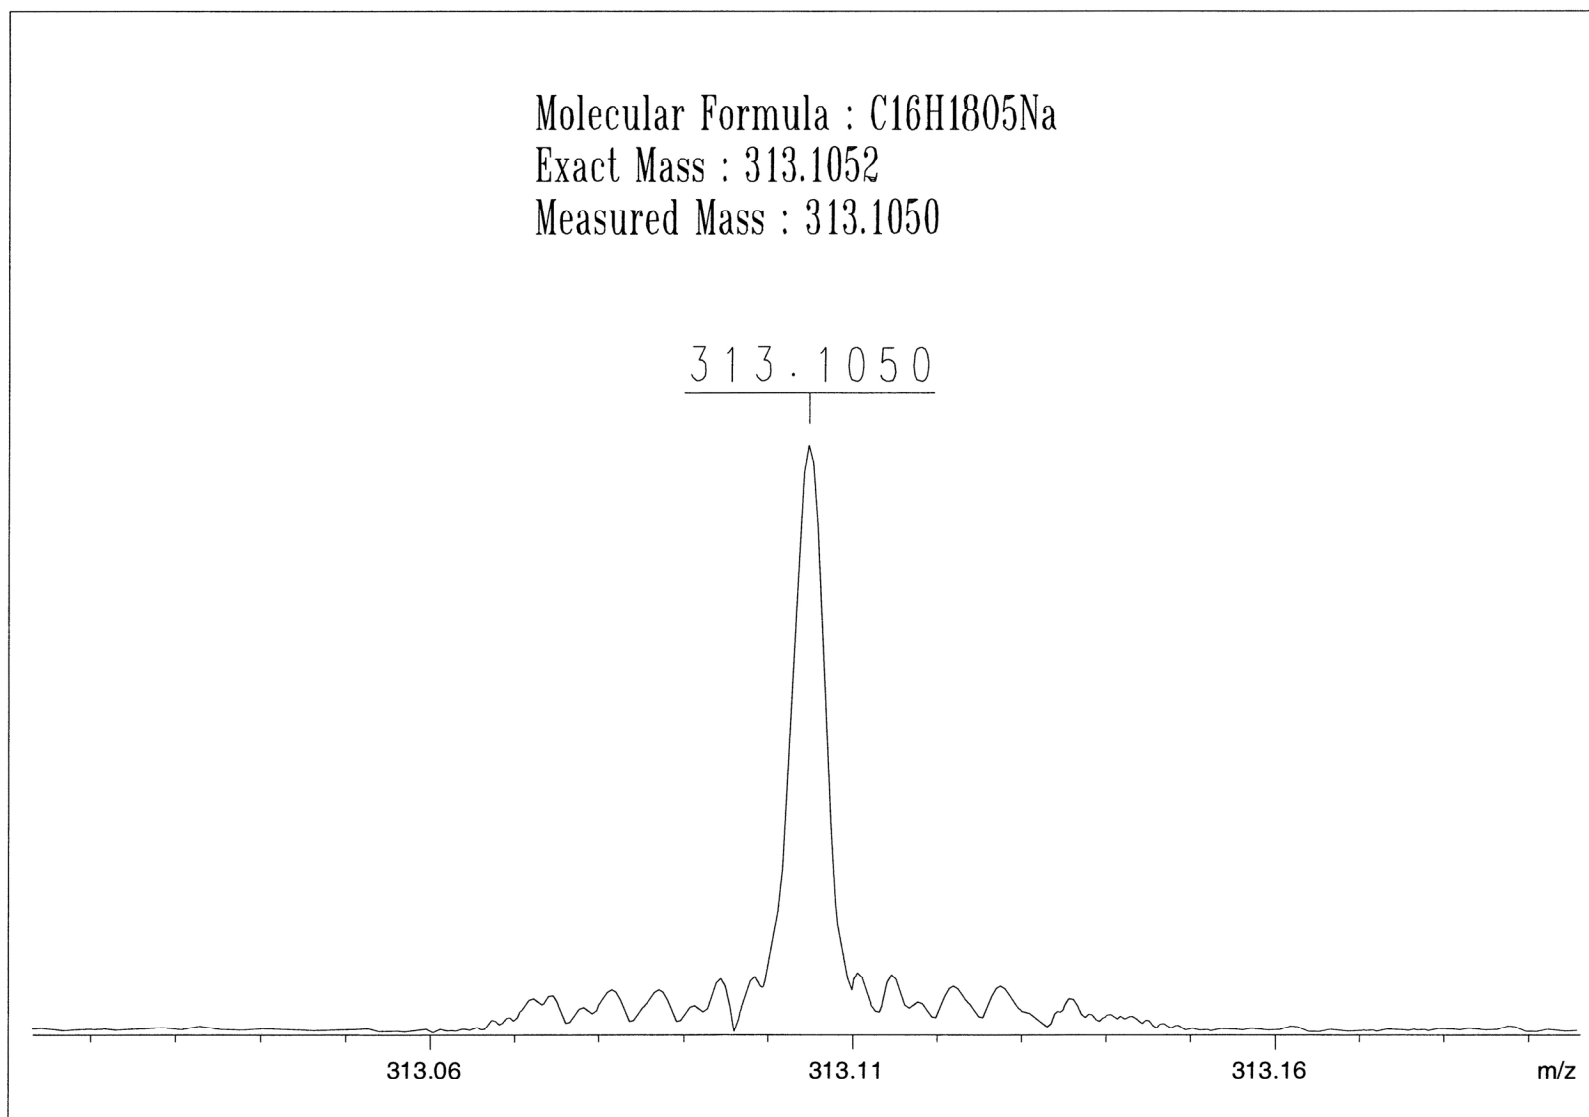

Figure S7. <sup>1</sup>H-NMR spectrum (CDCl<sub>3</sub>, 500 MHz) of 2.

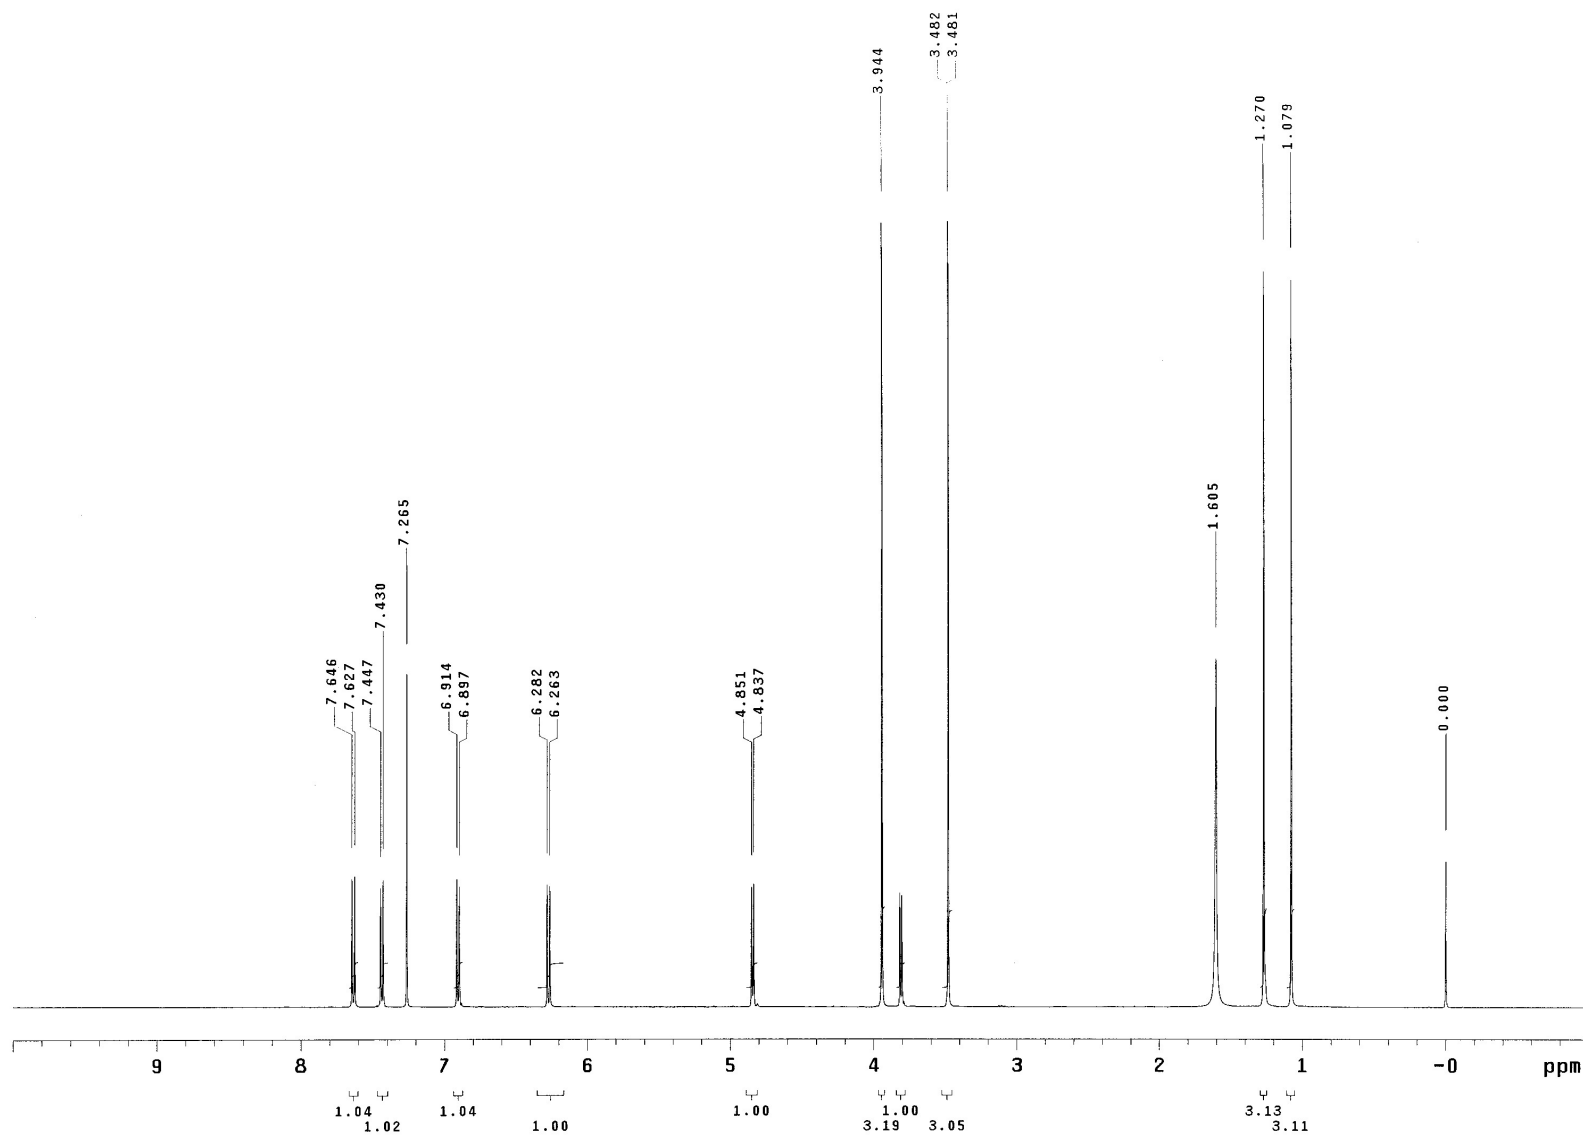

Figure S8.  $^{13}\text{C}$ -NMR spectrum ( $\text{CDCl}_3$ , 125 MHz) of 2.

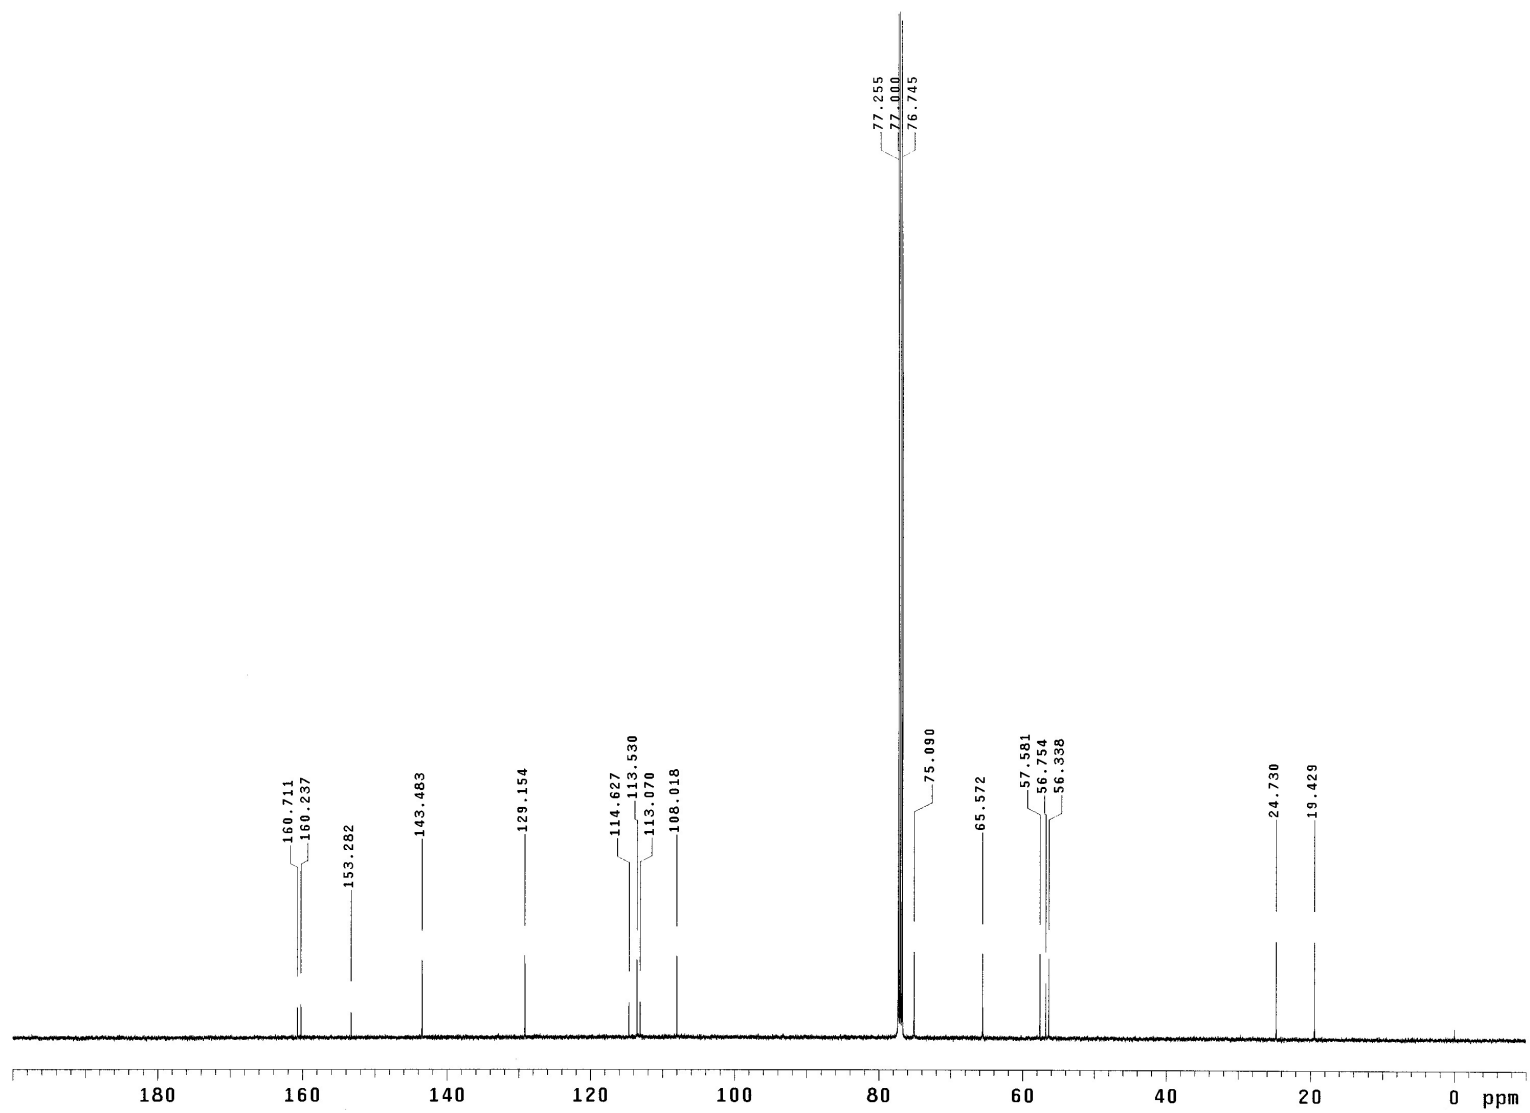



Figure S9. ESI-MS spectrum of 3.

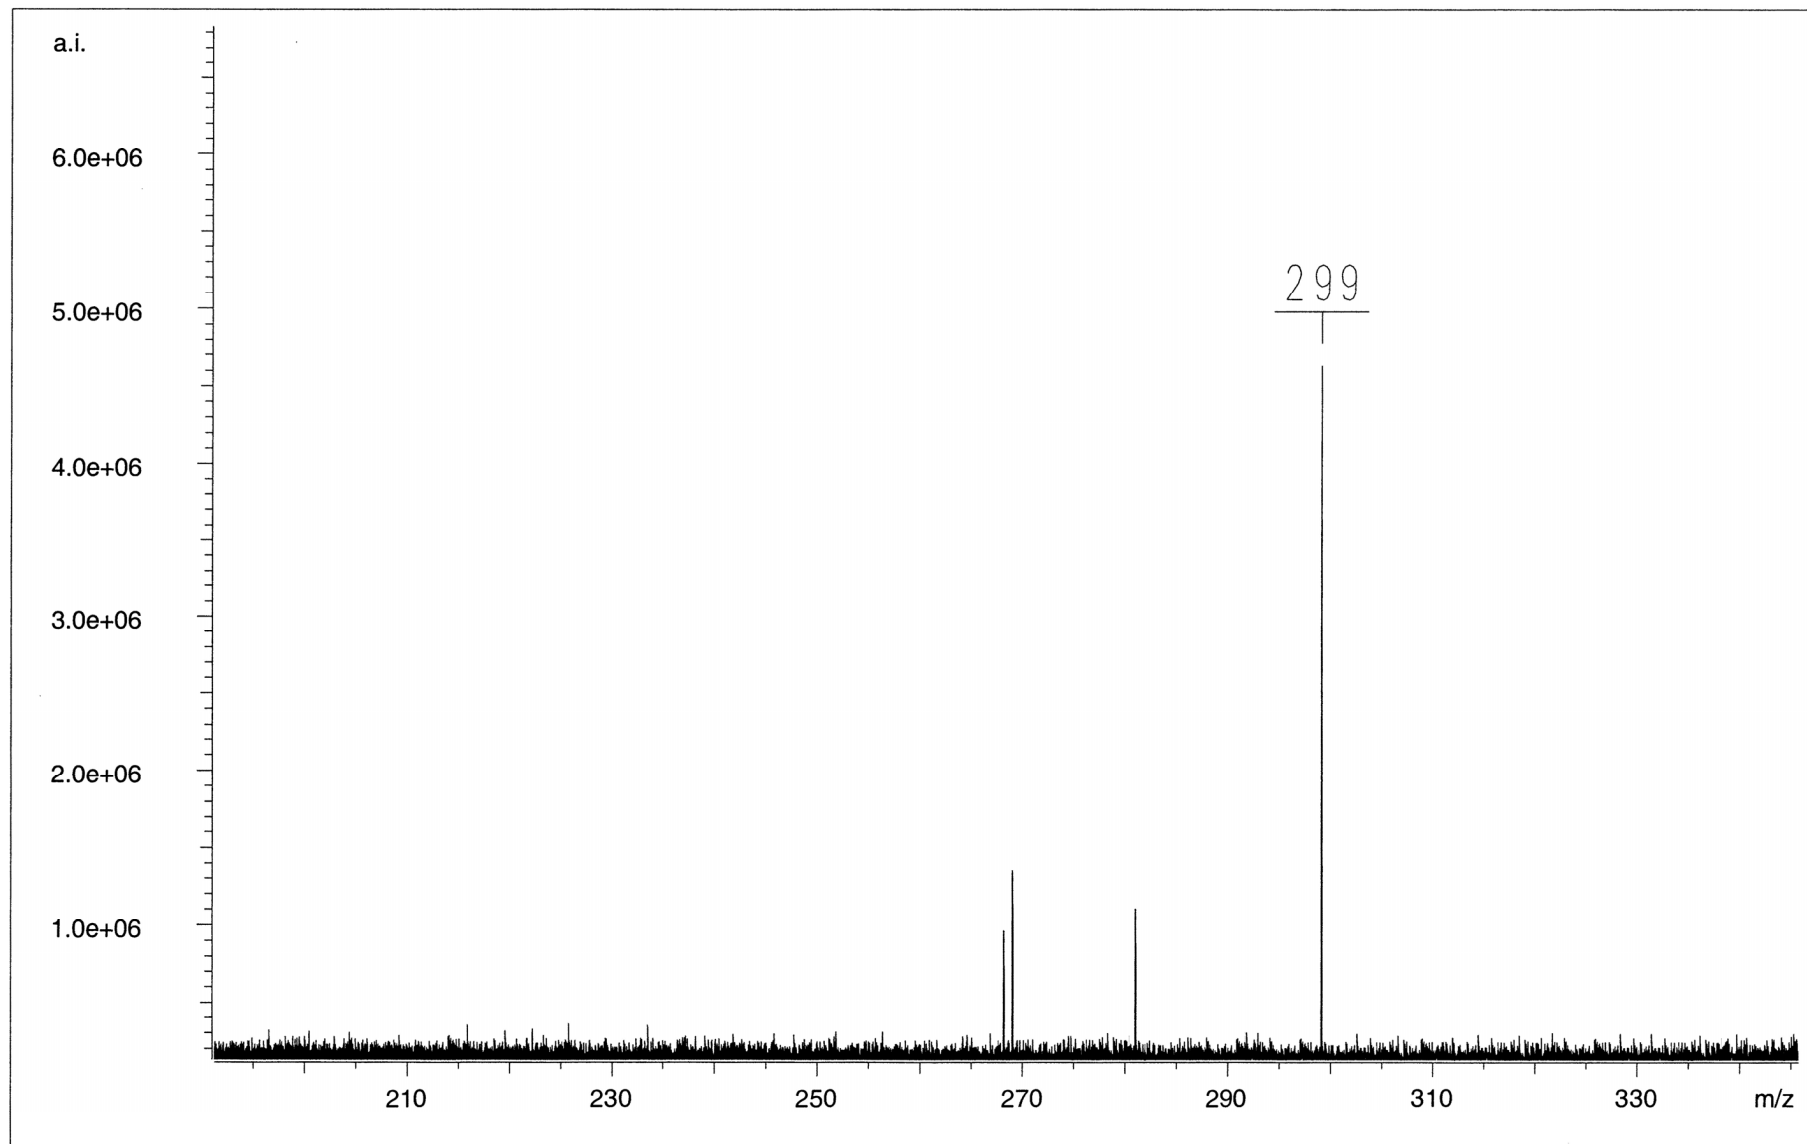

Figure S10. HR-ESI-MS spectrum of 3.

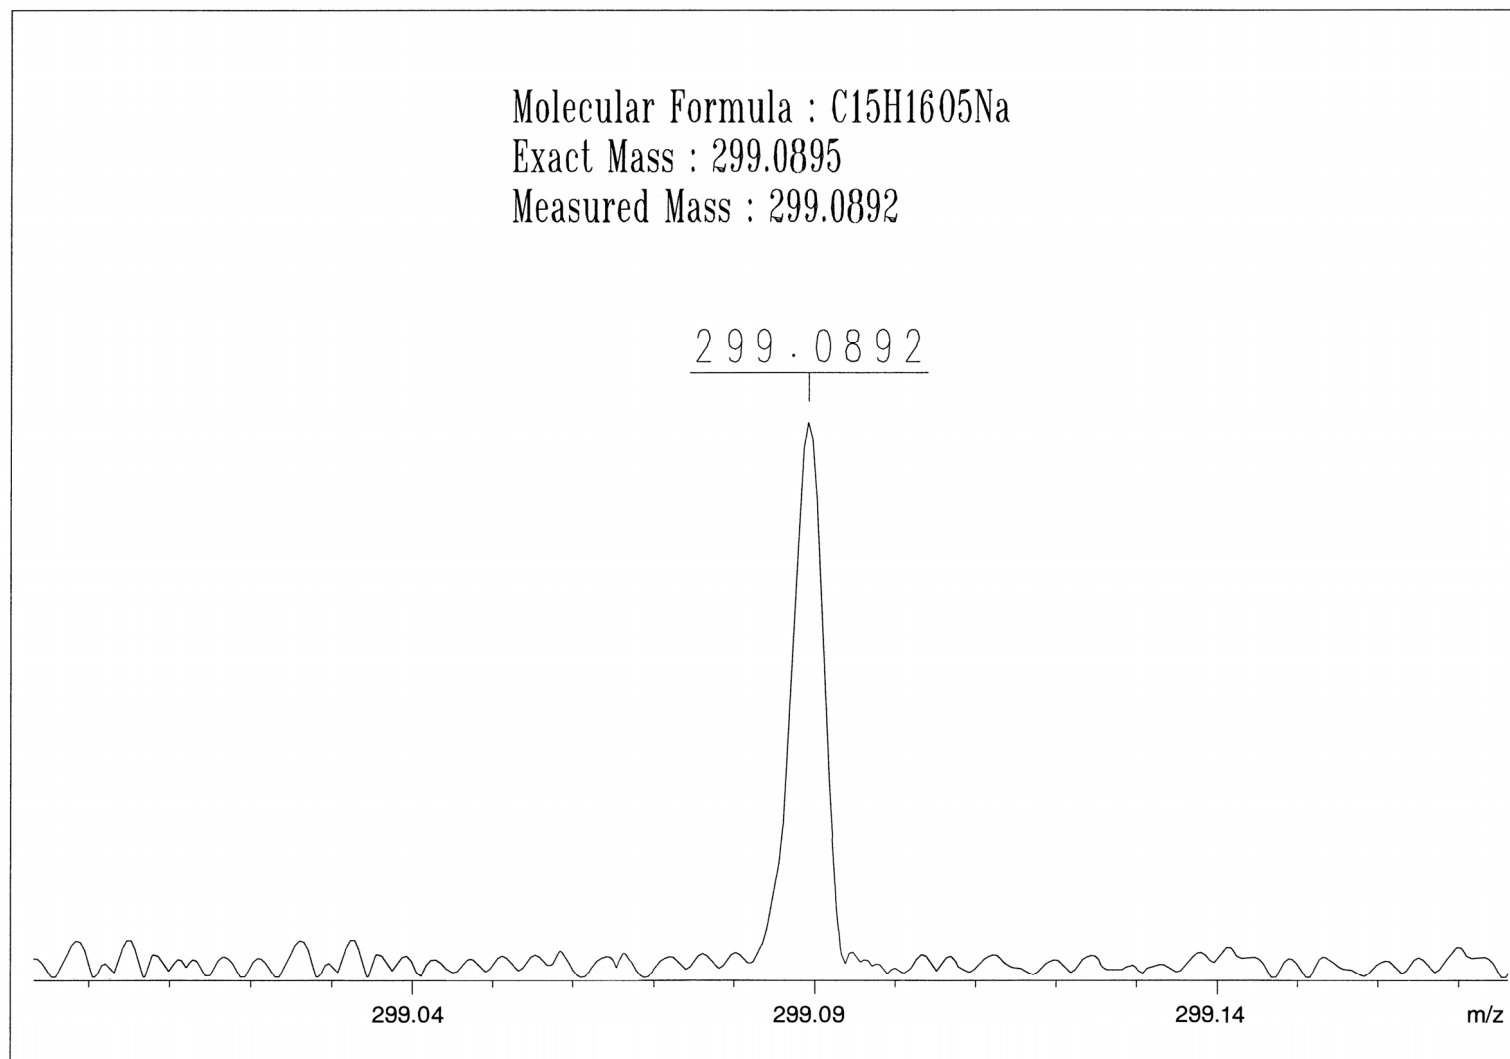

Figure S11.  $^1\text{H-NMR}$  spectrum ( $\text{CDCl}_3$ , 500 MHz) of **3**.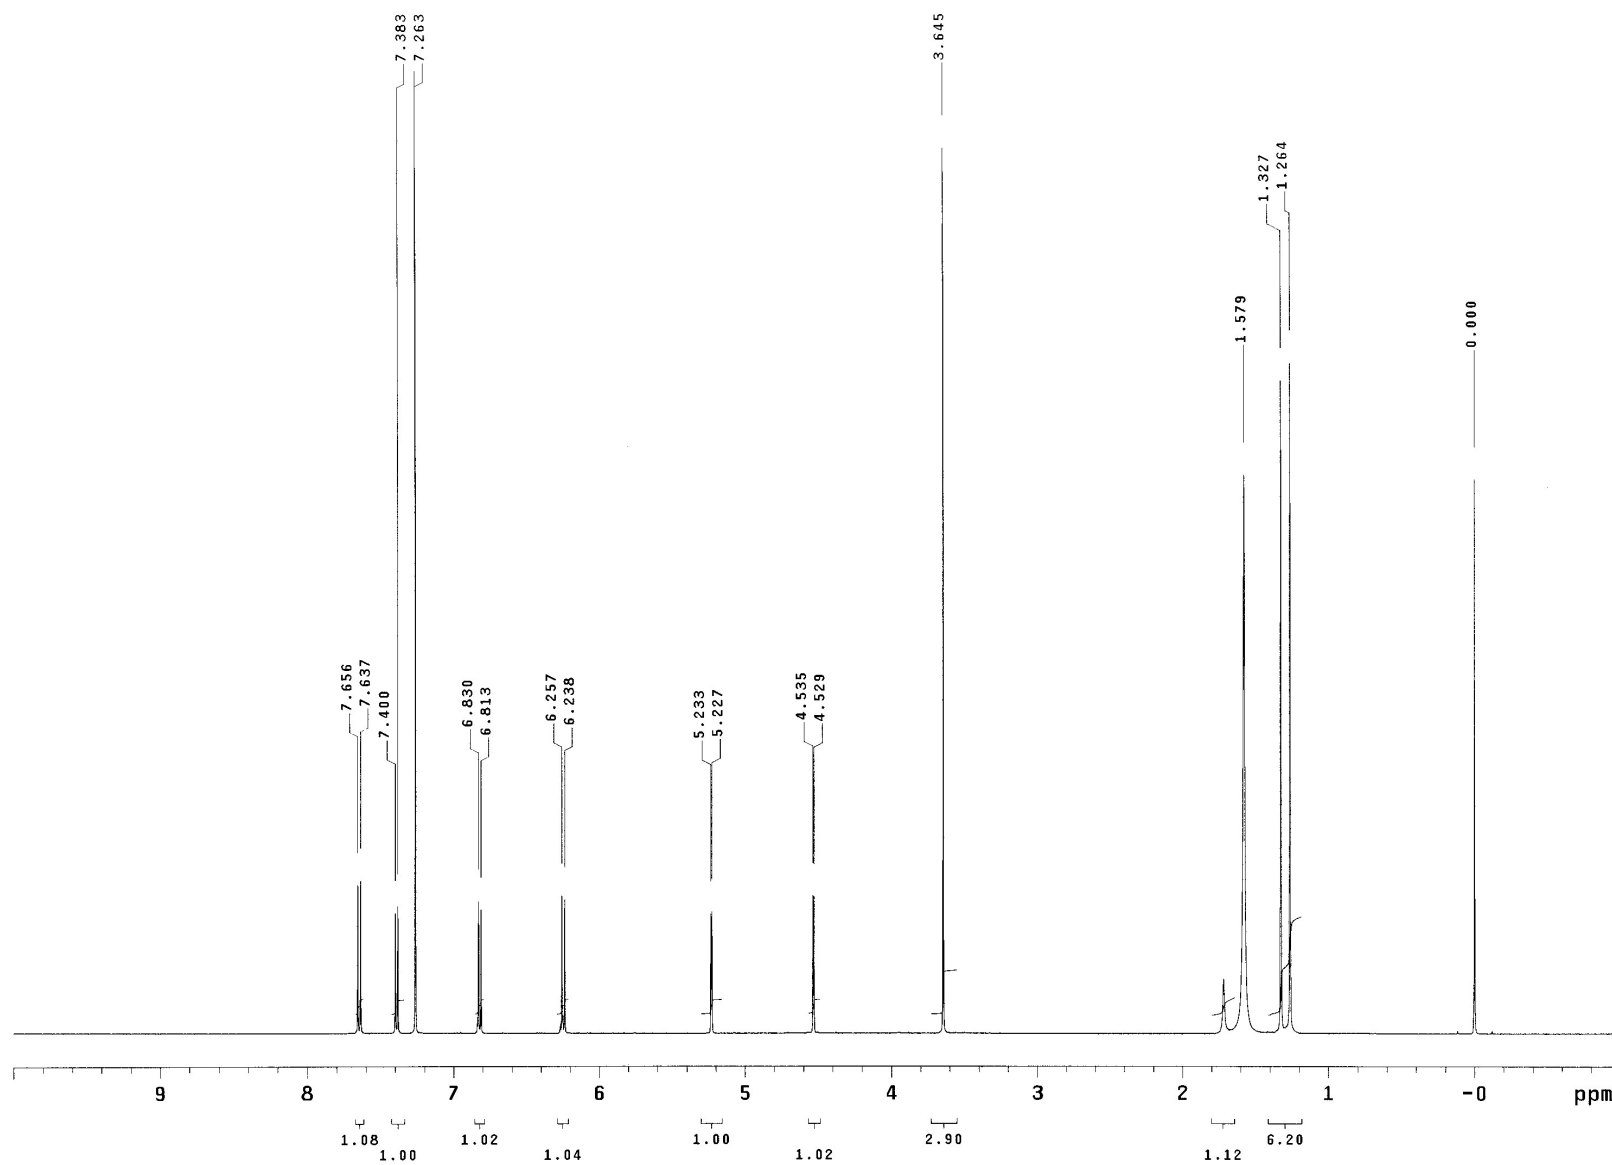

Figure S12.  $^{13}\text{C}$ -NMR spectrum of **3** ( $\text{CDCl}_3$ , 125 MHz).

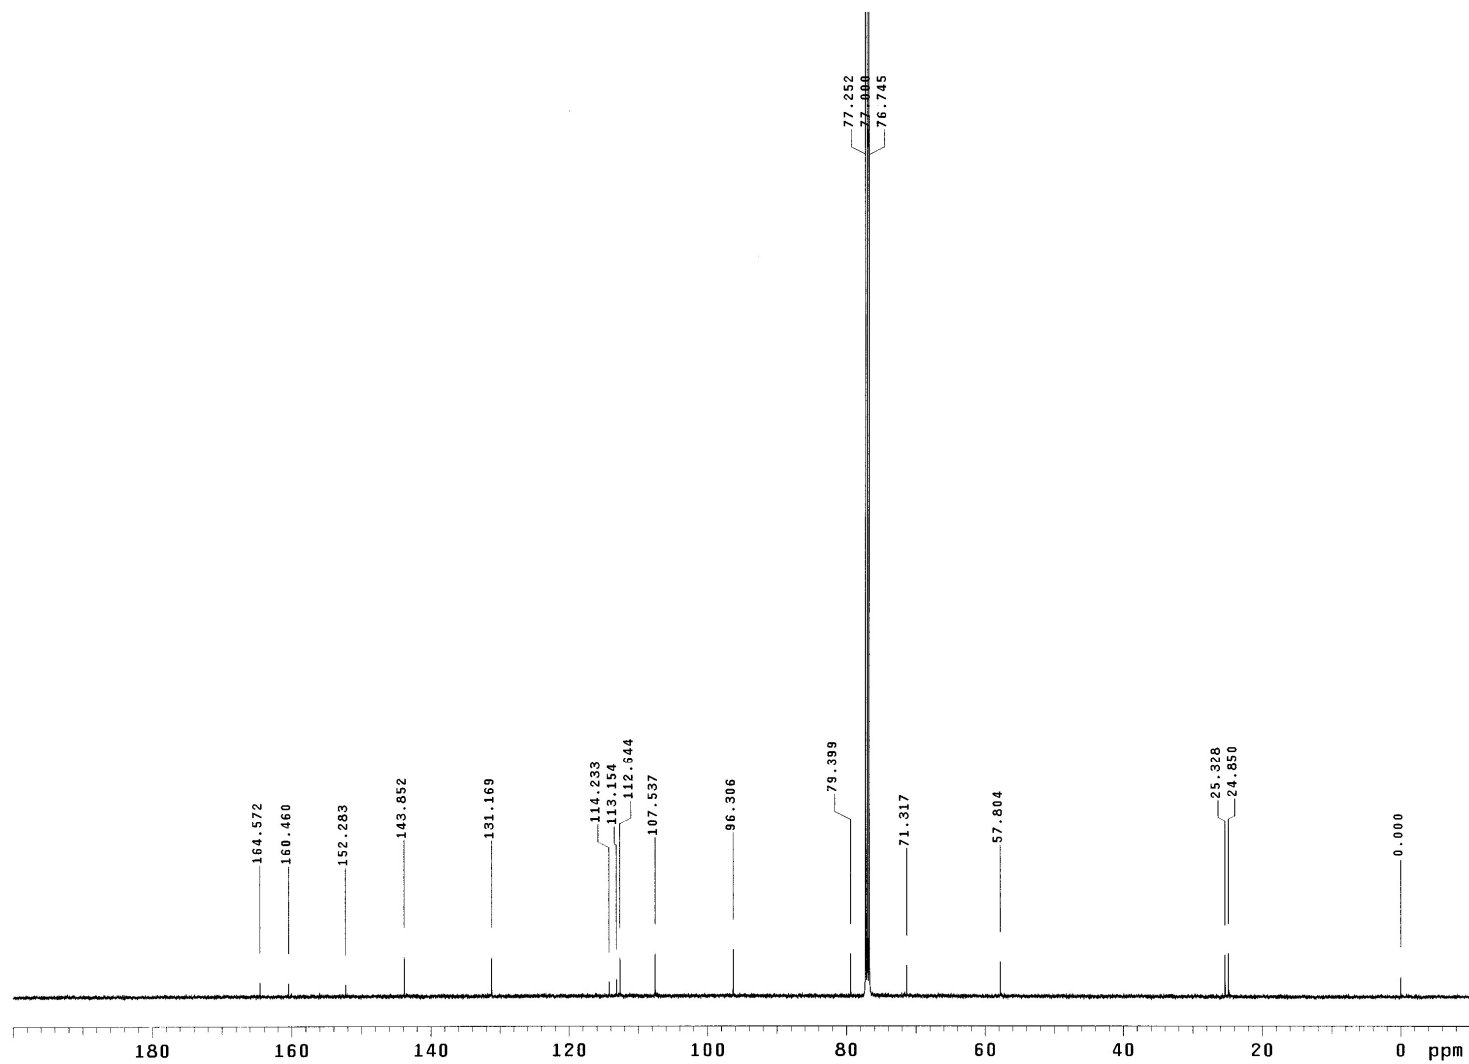

Supplement: ijms-15-09566-s001.pdf [file ijms-15-09566-s001.pdf]
